# Supplementary material
Source: publisher figshare collection journal article supplement (https://brill.figshare.com/ndownloader/files/28047510)
Supplement: Supplementary file 1 [file 28047510]

## Sheet: Total_data
Site_complete_name	Site	Transect	Year	Date dd/mm/yyyy	Hour (24 h)	Survey	Night	Sampling method (Net)	Niphargus	Dendrocoelum lacteum	Polycelis nigra	Glossiphonia sp.	Planipennia	Calopteryx	Ditiscidae	Erpobdella octoculata	Erpobdella testacea	Girinophylus sp. (larva)	Girinophylus sp. (adult)	Gyrinidae	Cordulegaster sp.	Odontoceridae	Philopotamidae	Rhyacophilidae	Total predator taxa	Value_predator_used for analysis
Erba_1_transettoA	Erba_1	A	2018	2018-01-21	14:00:00	1	0	0	0	0	4	0	0	0	0	0	0	0	0	0	0	0	0	0	1	2
Erba_1_transettoA	Erba_1	A	2018	2018-01-21	14:30:00	2	0	1	0	0	3	1	0	0	0	0	0	0	0	0	0	0	0	0	2	2
Erba_1_transettoA	Erba_1	A	2018	2018-02-06	22:40:00	3	1	0	7	3	1	0	0	0	0	0	0	0	0	0	0	0	0	0	2	1
Erba_1_transettoA	Erba_1	A	2018	2018-02-06	23:00:00	4	1	1	7	0	10	0	0	0	0	0	0	0	0	0	0	0	0	0	1	1
Erba_1_transettoA	Erba_1	A	2019	2019-02-16	21:00:00	5	1	0	1	5	0	2	0	0	5	0	0	0	0	0	0	0	0	0	3	3
Erba_1_transettoA	Erba_1	A	2019	2019-02-16	21:30:00	6	1	1	0	5	0	2	0	0	5	0	0	0	0	0	0	0	0	0	3	3
Erba_1_transettoA	Erba_1	A	2019	2019-02-17	08:20:00	7	0	0	0	0	300	0	0	0	0	0	0	0	0	0	0	0	0	0	1	1
Erba_1_transettoA	Erba_1	A	2019	2019-02-17	09:00:00	8	0	1	0	0	300	0	0	0	0	0	0	0	0	0	0	0	0	0	1	1
Erba_1_transettoA	Erba_1	A	2019	2019-02-22	08:10:00	9	0	0	0	0	8	1	0	0	0	0	0	0	0	0	0	0	0	0	2	2
Erba_1_transettoA	Erba_1	A	2019	2019-02-22	08:30:00	10	0	1	0	0	2	1	0	0	0	0	0	0	0	0	0	0	0	0	2	2
Erba_1_transettoA	Erba_1	A	2019	2019-02-23	20:30:00	11	1	0	0	0	0	0	0	0	0	0	0	0	0	0	0	0	0	0	1	1
Erba_1_transettoA	Erba_1	A	2019	2019-02-23	21:00:00	12	1	1	0	1	0	0	0	0	0	0	0	0	0	0	0	0	0	0	0	1
Erba_1_transettoA	Erba_1	A	2019	2019-02-24	10:00:00	13	0	0	0	0	16	0	1	0	0	0	0	0	0	0	0	0	0	0	2	2
Erba_1_transettoA	Erba_1	A	2019	2019-02-24	10:20:00	14	0	1	0	0	1	0	1	0	0	0	0	0	0	0	0	0	0	0	2	2
Erba_2_transettoA	Erba_2	A	2018	2018-01-21	15:30:00	1	0	0	0	0	100	0	0	0	0	0	0	0	0	0	0	0	0	0	1	1
Erba_2_transettoA	Erba_2	A	2018	2018-01-21	16:10:00	2	0	1	1	0	10	0	0	0	0	0	0	0	0	0	0	0	0	0	1	1
Erba_2_transettoA	Erba_2	A	2018	2018-02-06	00:10:00	3	1	0	3	4	100	0	0	0	0	0	0	0	0	0	0	0	0	0	2	2
Erba_2_transettoA	Erba_2	A	2018	2018-02-06	00:30:00	4	1	1	4	1	50	0	0	0	0	0	0	0	0	0	0	0	0	0	2	2
Erba_2_transettoA	Erba_2	A	2019	2019-02-17	09:30:00	5	0	0	0	0	0	0	1	0	2	0	0	0	0	1	1	1	1	0	6	6
Erba_2_transettoA	Erba_2	A	2019	2019-02-17	09:50:00	6	0	1	32	0	0	0	1	0	2	0	0	0	0	1	1	1	1	0	6	6
Erba_2_transettoA	Erba_2	A	2019	2019-02-23	21:30:00	7	1	0	2	0	0	0	0	0	0	0	1	0	0	0	0	0	0	0	1	2
Erba_2_transettoA	Erba_2	A	2019	2019-02-23	22:00:00	8	1	1	10	0	2	0	0	0	0	0	1	0	0	0	0	0	0	0	2	2
Erba_2_transettoB	Erba_2	B	2019	2019-02-23	22:30:00	1	1	0	0	0	0	0	0	0	0	0	0	0	0	0	0	0	0	1	1	1
Erba_2_transettoB	Erba_2	B	2019	2019-02-23	23:00:00	2	1	1	15	0	0	0	0	0	0	0	0	0	0	0	0	0	0	1	1	1
Erba_2_transettoA	Erba_2	A	2019	2019-02-24	09:00:00	9	0	0	0	0	10	1	0	0	0	0	0	0	0	0	0	0	0	0	2	2
Erba_2_transettoA	Erba_2	A	2019	2019-02-24	09:20:00	10	0	1	4	0	0	1	0	0	0	0	0	0	0	0	0	0	0	0	1	2
Erba_2_transettoB	Erba_2	B	2019	2019-02-24	09:30:00	3	0	0	0	0	0	0	0	0	0	0	0	0	0	0	0	0	0	0	0	0
Erba_2_transettoB	Erba_2	B	2019	2019-02-24	10:00:00	4	0	1	7	0	0	0	0	0	0	0	0	0	0	0	0	0	0	0	0	0
Merone 1_transettoA	Merone 1	A	2018	2018-01-14	10:10:00	1	0	0	0	0	50	0	0	0	3	0	0	0	0	0	0	0	0	0	2	3
Merone 1_transettoA	Merone 1	A	2018	2018-01-14	10:30:00	2	0	1	1	0	100	2	1	0	0	0	0	0	0	0	0	0	0	0	3	3
Merone 1_transettoA	Merone 1	A	2018	2018-02-02	20:00:00	3	1	0	1	4	0	0	0	0	0	0	0	0	0	0	0	0	0	0	1	4
Merone 1_transettoA	Merone 1	A	2018	2018-02-02	20:20:00	4	1	1	4	3	50	4	0	1	0	0	0	0	0	0	0	0	0	0	4	4
Merone 1_transettoA	Merone 1	A	2019	2019-02-16	22:00:00	5	1	0	0	5	0	0	0	0	0	0	0	0	0	0	0	0	0	0	1	2
Merone 1_transettoA	Merone 1	A	2019	2019-02-16	22:20:00	6	1	1	0	1	10	0	0	0	0	0	0	0	0	0	0	0	0	0	2	2
Merone 1_transettoB	Merone 1	B	2019	2019-02-16	22:40:00	1	1	0	0	10	0	0	0	0	0	0	0	0	0	0	0	0	0	0	1	2
Merone 1_transettoB	Merone 1	B	2019	2019-02-16	23:00:00	2	1	1	0	10	10	0	0	0	0	0	0	0	0	0	0	0	0	0	2	2
Merone 1_transettoA	Merone 1	A	2019	2019-02-17	10:10:00	7	0	0	0	0	0	0	0	0	0	0	0	0	0	0	0	0	0	0	0	1
Merone 1_transettoA	Merone 1	A	2019	2019-02-17	10:30:00	8	0	1	0	0	1	0	0	0	0	0	0	0	0	0	0	0	0	0	1	1
Merone 1_transettoB	Merone 1	B	2019	2019-02-17	10:50:00	3	0	0	0	0	0	0	0	0	0	0	0	0	0	0	0	0	0	0	0	1
Merone 1_transettoB	Merone 1	B	2019	2019-02-17	11:10:00	4	0	1	0	0	5	0	0	0	0	0	0	0	0	0	0	0	0	0	1	1
Merone 1_transettoA	Merone 1	A	2019	2019-02-22	08:50:00	9	0	0	0	0	10	0	1	0	0	0	0	0	0	0	0	0	0	0	2	3
Merone 1_transettoA	Merone 1	A	2019	2019-02-22	09:10:00	10	0	1	0	1	50	0	1	0	0	0	0	0	0	0	0	0	0	0	3	3
Merone 1_transettoB	Merone 1	B	2019	2019-02-22	09:30:00	5	0	0	0	0	50	1	0	0	0	0	0	0	0	0	0	0	0	0	2	3
Merone 1_transettoB	Merone 1	B	2019	2019-02-22	09:50:00	6	0	1	0	2	10	1	0	0	0	0	0	0	0	0	0	0	0	0	3	3
Merone 1_transettoA	Merone 1	A	2019	2019-02-23	23:10:00	11	1	0	0	4	52	0	1	0	0	0	0	0	0	0	0	0	0	0	3	3
Merone 1_transettoB	Merone 1	B	2019	2019-02-23	23:40:00	7	1	0	0	3	31	1	0	0	0	0	0	0	0	0	0	0	0	0	3	3
Merone 2_transettoA	Merone 2	A	2018	2018-01-12	10:30:00	1	0	0	0	2	0	0	0	0	0	0	0	0	0	0	0	0	0	0	1	2
Merone 2_transettoA	Merone 2	A	2018	2018-01-12	11:00:00	2	0	1	0	1	0	0	0	0	0	1	0	0	0	0	0	0	0	0	2	2
Merone 2_transettoA	Merone 2	A	2018	2018-02-02	20:40:00	3	1	0	1	0	0	0	0	0	0	0	0	0	0	0	0	0	0	0	0	1
Merone 2_transettoA	Merone 2	A	2018	2018-02-02	21:00:00	4	1	1	2	2	0	0	0	0	0	0	0	0	0	0	0	0	0	0	1	1
Merone 2_transettoA	Merone 2	A	2019	2019-02-16	23:20:00	5	1	0	1	0	20	0	0	0	0	1	0	0	0	0	0	0	0	0	2	2
Merone 2_transettoA	Merone 2	A	2019	2019-02-16	23:40:00	6	1	1	1	0	40	0	0	0	0	1	0	0	0	0	0	0	0	0	2	2
Merone 2_transettoA	Merone 2	A	2019	2019-02-17	11:30:00	7	0	0	0	0	200	0	0	0	0	0	1	0	0	0	0	0	0	0	2	2
Merone 2_transettoA	Merone 2	A	2019	2019-02-17	11:50:00	8	0	1	0	0	300	0	0	0	0	0	1	0	0	0	0	0	0	0	2	2
Merone 2_transettoA	Merone 2	A	2019	2019-02-22	09:00:00	9	0	0	0	0	125	0	0	0	0	0	0	0	0	0	0	0	0	0	1	1
Merone 2_transettoA	Merone 2	A	2019	2019-02-22	09:20:00	10	0	1	0	0	327	0	0	0	0	0	0	0	0	0	0	0	0	0	1	1
